# Supplementary material
Source: publisher figshare collection journal article supplement (https://acs.figshare.com/ndownloader/files/18005996)
Supplement: Supplementary file 1 [file 18005996]

# Supporting Information

## Effect of the Diamagnetic Single Crystalline Host on the Angular Resolved Electron Nuclear Double Resonance Experiments: Case of Paramagnetic [<sup>n</sup>Bu<sub>4</sub>N]<sub>2</sub>[Cu(opba)] Embedded in Diamagnetic [<sup>n</sup>Bu<sub>4</sub>N]<sub>2</sub>[Ni(opba)]

*Ruslan Zaripov<sup>1\*†</sup>, Stanislav Avdoshenko<sup>2\*†</sup>, Iskander Khairuzhdinov<sup>1</sup>, Kev Salikhov<sup>1</sup>, Violeta Voronkova<sup>1</sup>, Saddam Weheabby<sup>3</sup>, Tobias Ruffer<sup>3</sup>, Alexey Popov<sup>2</sup>, Bernd Büchner<sup>2,4</sup>, and Vladislav Kataev<sup>4\*</sup>*

<sup>1</sup> Zavoisky Physical -Technical Institute, FRC Kazan Scientific Center of RAS, 420029 Kazan,  
Russia

<sup>2</sup> Leibniz Institute for Solid State and Materials Research IFW Dresden, D-01171 Dresden,  
Germany

<sup>3</sup> Technische Universität Chemnitz, Fakultät für Naturwissenschaften, Institut für Chemie, Straße  
der Nationen 62, D-09111 Chemnitz, Germany

<sup>4</sup> Institut für Festkörper- und Materialphysik, Technische Universität Dresden, D-01062 Dresden,  
Germany

\* Ruslan Zaripov - [zaripov.ruslan@gmail.com](mailto:zaripov.ruslan@gmail.com)

\* Stanislav Avdoshenko – [s.avdoshenko@ifw-dresden.de](mailto:s.avdoshenko@ifw-dresden.de)

\* Vladislav Kataev – [v.kataev@ifw-dresden.de](mailto:v.kataev@ifw-dresden.de)

† These authors contributed equally to this work

## **Table of contents**

- 1. Optimized structures of considered systems;**
- 2. VASP and Orca scripts;**
- 3. Theoretical background for ENDOR modeling;**

## 1. Optimized structures of considered systems

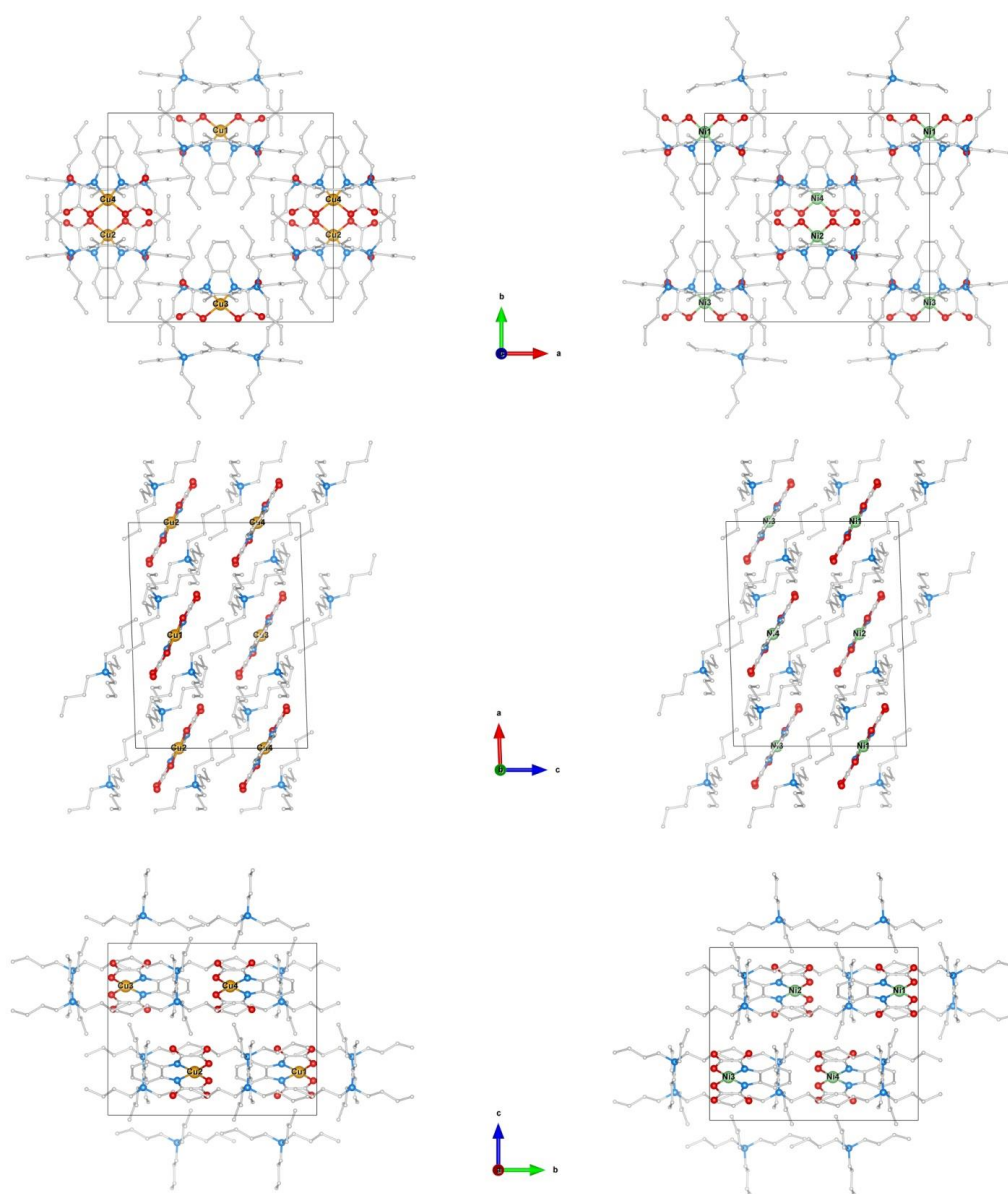

**Figure S1.** *a*-, *b*-, and *c*- projections of VASP optimized paramagnetic  $[n\text{Bu}_4\text{N}]_2[\text{Cu}(\text{opba})]$  diamagnetic  $[n\text{Bu}_4\text{N}]_2[\text{Ni}(\text{opba})]$  polymorphs.

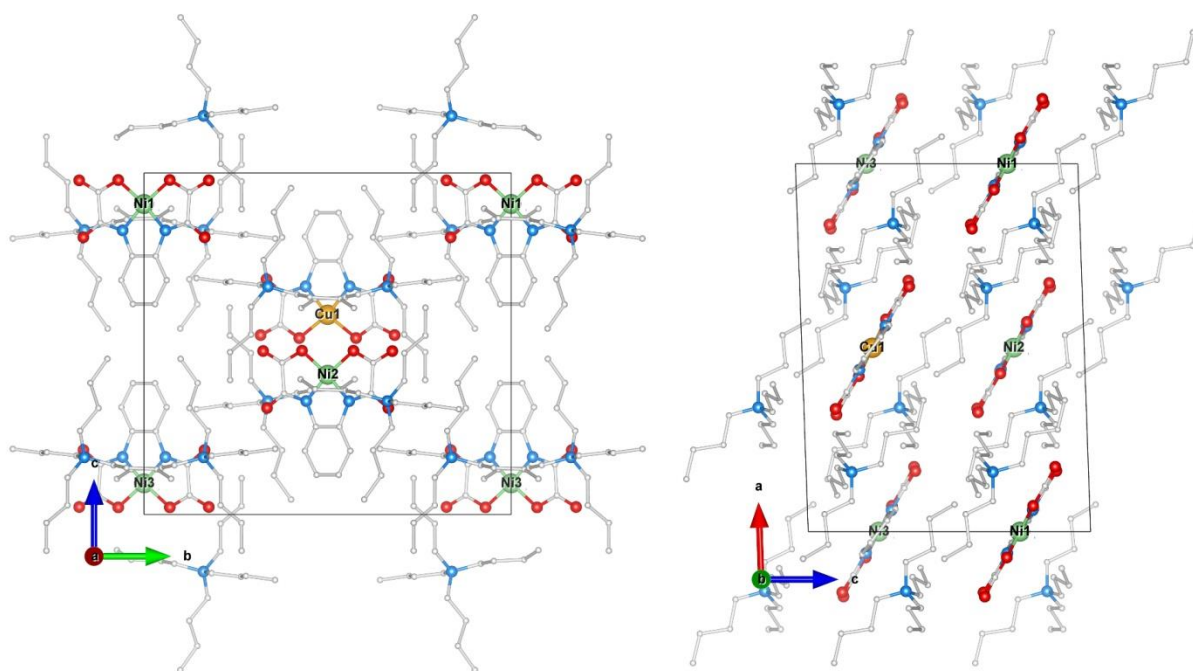

**Figure S2.** *a*-, *b*- projection of VASP optimized mixed (MIX) system  $[\text{nBu}_4\text{N}]_2[\text{Cu}(\text{opba})]$  in  $[\text{nBu}_4\text{N}]_2[\text{Ni}(\text{opba})]$  matrix.

## 2. VASP and Orca scripts

Examples of employed theoretical scripts in VASP and ORCA modeling:

a)  $[\text{nBu}_4\text{N}]_2[\text{Cu}(\text{opba})]$  VASP optimization script:

```

1  PREC = Normal           ! standard precision
2  ENCUT = 600             ! cutoff
3  ISMEAR = 0 ; SIGMA = 0.1
4  IBRION = 1              ! optimization
5  NSW = 3000              ! # of steps
6  IVDW=11                ! DFT-D3 by Grimme
7  ISPIN = 2               ! spin polarized
8  MAGMOM = 512*0.0000 4*1.0000 ! starting spin
9  EDIFFG = -0.005         ! optimization criteria
10 ALGO = F                ! RMMDIIS method
11 LREAL=Auto

```

b)  $[\text{Cu}(\text{opba})]^{-2}$  Orca **A**-, **Q**- tensors modeling script:

```

1 ! UKS PBE0 def2-TZVP SlowConv Grid7 NoFinalGrid VERYTIGHTSCF PRINTBASIS
2 %pal nprocs 48
3 end
4 %cosmo epsilon 8.93
5 refrac 1.424
6 end
7 * xyz -2 2
8 C 2.572289856 -0.043527309 0.018908301
9 C 2.701731833 -1.601408694 -0.069541268
10 C 0.716228814 1.598922398 0.050540165
11 C 1.399235448 2.821679999 0.161833910
12 C 0.693728363 4.025505249 0.095864631
13 C -2.572765115 -0.042833190 -0.018677221
14 C -2.701074556 -1.600347928 0.069444448
15 C -0.715813725 1.599218028 -0.050223476
16 C -1.398503122 2.822007421 -0.161874083
17 C -0.692753395 4.025732177 -0.096440887
18 H 2.480519080 2.802065734 0.277722960
19 H 1.232935724 4.970613372 0.181602388
20 H -2.479803093 2.802603687 -0.277773307
21 H -1.231657192 4.970792041 -0.182396181
22 N 1.287483355 0.328408916 0.022144363
23 N -1.287286967 0.328615515 -0.021738381
24 O 3.591670214 0.686850331 0.086073750
25 O 1.580995758 -2.273061326 -0.125778994
26 O 3.828241850 -2.124112270 -0.087337844
27 O -3.591247366 0.687566083 -0.085700397
28 O -1.581578595 -2.272729158 0.125095997
29 O -3.829444101 -2.123546177 0.087513075
30 Cu -0.000168824 -1.103780758 -0.000011101
31 *
32 %basis
33 newGTO N "EPR-III" end
34 newGTO H "EPR-III" end
35 newGTO Cu "CP(PPP)" end
36 end
37 %method
38 ProgPlot "./orca_plot"
39 IntAcc 9.0
40 end
41 %eprnmr
42 nuclei = all Cu {aizo, adip, aorb, fgrad, rho}
43 nuclei = all N {aizo, adip, aorb, fgrad, rho}
44 GTensor 1
45 Ori 22
46 PrintLevel 4
47 end
48 %rel
49 >> SOCType 3|
50 >> SOCFlags 1,3,3,1
51 end

```

### 3. Theoretical background for ENDOR modeling

Although in the main text we employed widely used set of pre-scripted algorithms in EasySpin5.2 below we outline the minimal level of theory sufficient for ENDOR modeling within density matrix formalism.

**ENDOR.** Theoretical calculations were performed numerically within the framework of a formalism of the density matrix considering one electron and two nitrogen nuclei spins. In this

case, the transitions between the nitrogen sublevels are excited. The carrier frequency of the ENDOR pulse was selected specifically for the region of transitions between the nuclear sublevels of nitrogen, so we restricted ourselves to only these nuclei.

The initial density matrix was taken as an equilibrium one, i.e.

$$\rho_0 = S_z.$$

The hyperfine and quadrupole interactions were described as:

$$H_{int} = A_{(N1)zz} S_z I_{(N1)z} + A_{(N2)zz} S_z I_{(N2)z} + Q_{(N1)zz} I_{(N1)z} I_{(N1)z} + Q_{(N2)zz} I_{(N2)z} I_{(N2)z}$$

where A is the HFI tensor and Q is the quadrupole interaction tensor.

During the pulse, the spin Hamiltonian can be written as:

$$H_p = (\gamma g_{eff} B_0 - \omega_0) S_z - \gamma_N B_0 I_{(N1)z} - \gamma_N B_0 I_{(N2)z} + \gamma g_{eff} B_1 S_x + H_{int}.$$

Here the parameters were set as  $B_1 \approx 10$  Gs;  $t_{p1} = t_{p2} = t_{p4} = 8$  ns and  $\omega_0 = 9682$  MHz.

The density matrix after the first microwave pulse reads:

$$\rho_1 = e^{-i H_p t_{p1}} \rho_0 e^{i H_p t_{p1}}.$$

The evolution period can be described by the spin Hamiltonian:

$$H_0 = \gamma g_{eff} B_0 S_z - \gamma_N B_0 I_{(N1)z} - \gamma_N B_0 I_{(N2)z} + H_{int}.$$

After the first evolution period  $\tau$  the density matrix can be defined as:

$$\rho_2 = e^{-i H_0 \tau} \rho_1 e^{i H_0 \tau}.$$

The density matrix after the action of the second  $\pi / 2$  pulse takes the form:

$$\rho_3 = e^{-i H_p t_{p2}} \rho_2 e^{i H_p t_{p2}}.$$

Before and after the action of the second  $\pi / 2$  pulse, we nullified the off-diagonal elements of the density matrix, leaving only the populations:

$$\rho_{3(i,j)} = 0, i \neq j.$$

The action of the ENDOR pulse ( $B_1 \approx 0.1$  Gs;  $t_{p3} = 8$  ns) can be described by the spin Hamiltonian:

$$H_{ENDOR} = -(\gamma_N B_0 - \omega)I_{(N1)z} - (\gamma_N B_0 - \omega)I_{(N2)z} + H_{int} + \gamma_N B_1 I_{(N1)x} + \gamma_N B_1 I_{(N2)x}.$$

The density matrix after the action of the ENDOR pulse reads:

$$\rho_4 = e^{-i H_{ENDOR} t_{p3}} \rho_3 e^{i H_{ENDOR} t_{p3}}.$$

Before and after the action of the ENDOR pulse, we again nullified the off-diagonal elements of the density matrix, leaving only populations.

$$\rho_{4(i,j)} = 0, i \neq j.$$

The density matrix after the action of the third  $\pi / 2$  pulse takes the form:

$$\rho_5 = e^{-i H_p t_{p4}} \rho_4 e^{i H_p t_{p4}}.$$

The density matrix after the second evolution during the time  $\tau$  can be written as:

$$\rho = e^{-i H_0 \tau} \rho_5 e^{i H_0 \tau}$$

Finally, the signal was estimated from the amplitude of the echo signal as  $Spur[Sy.\rho]$ , where  $\rho$  is the density matrix of the system at the time of the echo formation. The dependence of the ENDOR signal was constructed from the ENDOR of the  $\omega$  pulse. The parameters for the simulation were the eigenvalues of the HFI tensors of two nitrogen ligands ( $A_{N1\perp}$ ,  $A_{N1\parallel}$ ,  $A_{N1\perp}$ ,  $A_{N1\parallel}$ ), and their rotation Euler angles  $(\alpha, \beta)$  relative to the copper HFI tensor. Since we assumed the axial

symmetry of all the HFI tensors, we limited ourselves to two rotation angles for each HFI tensor of the nitrogen nuclei.

**EasySpin modeling.** The online version of ESI also contains the animations for angle resolved ESR/ENDOR spectra for different orientation rotation axis.

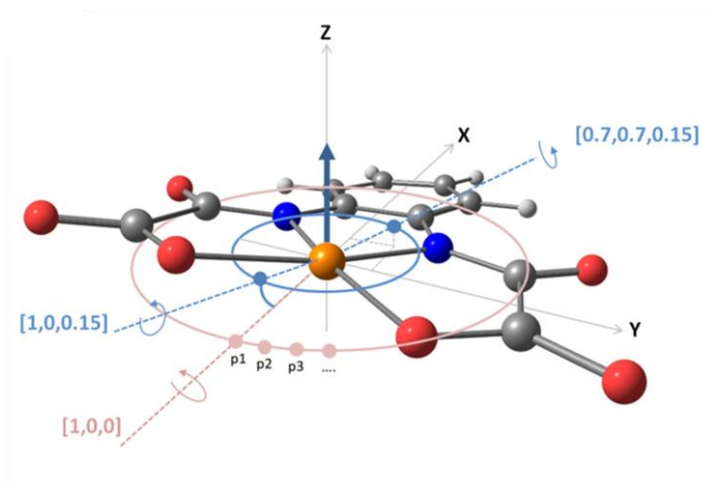

A1: rotation axis on the ping ring axes ( $\phi_1, \phi_2, \phi_3 \dots$ ): **anim1\_video.mp4**

A2: rotation axis on the blue ring: **anim2\_video.mp4**

A3. rotation axis goes through the origin and a node of the Fibonacci Sphere with 120 nodes:  
**anim3\_video.mp4**

S1. ES spectra evaluation while rotation axis on the ping ring axes: **anim4\_video.mp4**
